# Supplementary material
Source: publisher figshare collection journal article supplement (https://tandf.figshare.com/articles/dataset/_/3083800)
Supplement: Supplementary file 1 [file 1]

Supplement Table III. Mean ITP hospitalization cost by bleeding and age and IVIg use and age.

| Variable | Age         | No bleeding | Bleeding | Difference (bleeding – no bleeding) |
|----------|-------------|-------------|----------|-------------------------------------|
| Bleeding | 6–12 months | \$3574      | \$4033   | + \$459                             |
|          | 1–5 years   | \$3831      | \$4875   | + \$1044                            |
|          | 6–9 years   | \$5243      | \$6394   | + \$1151                            |
|          | 10–13 years | \$7146      | \$10 258 | + \$3112                            |
|          | 14–17 years | \$7593      | \$13 307 | + \$5714                            |
| Variable | Age         | No IVIg use | IVIg use | Difference (IVIg – no IVIg)         |
| IVIg use | 6–12 months | 3600        | 3590     | –\$10                               |
|          | 1–5 years   | 3651        | 4516     | + \$865                             |
|          | 6–9 years   | 5113        | 6112     | + \$999                             |
|          | 10–13 years | 6714        | 9308     | + \$2594                            |
|          | 14–17 years | 7191        | 11 799   | + \$4608                            |

ITP, immune thrombocytopenia; IVIg, intravenous immunoglobulin.
