# Supplementary material
Source: publisher figshare collection journal article supplement (https://tandf.figshare.com/articles/dataset/_/3083800)
Supplement: Supplementary file 2 [file 1]

Archive with 3 entries (3 files):
- SuppTableIII.pdf
- SuppTableI.pdf
- SuppTableII.pdf
