# Supplementary material
Source: publisher figshare collection journal article supplement (https://tandf.figshare.com/articles/dataset/_/3083800)
Supplement: Supplementary file 2 [file 1 › SuppTableI.pdf]

Supplement Table I. Definitions of conditions and utilization variables.

| Key variable                                                                                                        | Code type       | Specific codes                                          |
|---------------------------------------------------------------------------------------------------------------------|-----------------|---------------------------------------------------------|
| Transfusion types                                                                                                   |                 |                                                         |
| Platelet transfusion                                                                                                | ICD-9 procedure | 99.05                                                   |
| Other transfusion                                                                                                   | ICD-9 procedure | 99.04, 99.06, 99.07, 99.08                              |
| Injections and infusions                                                                                            |                 |                                                         |
| Ig injections                                                                                                       |                 |                                                         |
| Anti-D injections                                                                                                   | ICD-9 procedure | 99.11                                                   |
| IVIg injections                                                                                                     | ICD-9 procedure | 99.14                                                   |
| Electrolytes                                                                                                        | ICD-9 procedure | 99.18                                                   |
| Steroids                                                                                                            | ICD-9 procedure | 99.23                                                   |
| Chemotherapy related                                                                                                | ICD-9 procedure | 99.25, 99.28                                            |
| Operations on bone marrow and spleen                                                                                |                 |                                                         |
| Bone marrow diagnostics<br>(i.e. biopsy or microscopic<br>examination of specimen of<br>bone marrow or spleen, etc) | ICD-9 procedure | 41.3, 41.31, 41.32, 41.33, 41.38,<br>41.39, 41.98, 90.6 |
| Partial splenectomy                                                                                                 | ICD-9 procedure | 41.43                                                   |
| Total splenectomy                                                                                                   | ICD-9 procedure | 41.5                                                    |
| Accessory spleen                                                                                                    | ICD-9 procedure | 41.93                                                   |
| Other spleen-related<br>procedure                                                                                   | ICD-9 procedure | 41.99                                                   |
| Infection diagnosis                                                                                                 |                 |                                                         |

---

|                                                                                                         |               |     |
|---------------------------------------------------------------------------------------------------------|---------------|-----|
| Tuberculosis                                                                                            | CCS diagnosis | 1   |
| Septicemia (except in labor)                                                                            | CCS diagnosis | 2   |
| Bacterial infection                                                                                     | CCS diagnosis | 3   |
| Mycoses                                                                                                 | CCS diagnosis | 4   |
| HIV infection                                                                                           | CCS diagnosis | 5   |
| Hepatitis                                                                                               | CCS diagnosis | 6   |
| Viral infection                                                                                         | CCS diagnosis | 7   |
| Other infection: including<br>parasitic                                                                 | CCS diagnosis | 8   |
| Sexually transmitted<br>infections (not HIV or<br>hepatitis)                                            | CCS diagnosis | 9   |
| Other CNS infection and<br>poliomyelitis                                                                | CCS diagnosis | 78  |
| Inflammation; infection of eye<br>(except caused by<br>tuberculosis or sexually<br>transmitted disease) | CCS diagnosis | 90  |
| Other upper respiratory<br>infections                                                                   | CCS diagnosis | 126 |
| Urinary tract infections                                                                                | CCS diagnosis | 159 |
| Skin and subcutaneous<br>tissue infections                                                              | CCS diagnosis | 197 |

---

|                                      |                 |                                                                                                                                                                                                                                                                                                                                                                                                                                                                                                                                                                                                                                                                                       |
|--------------------------------------|-----------------|---------------------------------------------------------------------------------------------------------------------------------------------------------------------------------------------------------------------------------------------------------------------------------------------------------------------------------------------------------------------------------------------------------------------------------------------------------------------------------------------------------------------------------------------------------------------------------------------------------------------------------------------------------------------------------------|
| Thrombosis                           | CCS diagnosis   | 116, 118                                                                                                                                                                                                                                                                                                                                                                                                                                                                                                                                                                                                                                                                              |
| Septic shock                         | ICD-9 diagnosis | 785.5, 785.50, 785.51, 785.52,<br>785.59                                                                                                                                                                                                                                                                                                                                                                                                                                                                                                                                                                                                                                              |
| Bleeding events                      |                 |                                                                                                                                                                                                                                                                                                                                                                                                                                                                                                                                                                                                                                                                                       |
| Traumatic intracranial<br>hemorrhage | ICD-9 diagnosis | 800.20, 800.21, 800.22, 800.23,<br>800.24, 800.25, 800.26, 800.29,<br>800.30, 800.31, 800.32, 800.33,<br>800.34, 800.35, 800.36, 800.39,<br>800.70, 800.71, 800.72, 800.73,<br>800.74, 800.75, 800.76, 800.79,<br>800.80, 800.81, 800.82, 800.83,<br>800.84, 800.85, 800.86, 800.89,<br>801.20, 801.21, 801.22, 801.23,<br>801.24, 801.25, 801.26, 801.29,<br>801.30, 801.31, 801.32, 801.33,<br>801.34, 801.35, 801.36, 801.39,<br>801.70, 801.71, 801.72, 801.73,<br>801.74, 801.75, 801.76, 801.79,<br>801.80, 801.81, 801.82, 801.83,<br>801.84, 801.85, 801.86, 801.89,<br>803.20, 803.21, 803.22, 803.23,<br>803.24, 803.25, 803.26, 803.29,<br>803.30, 803.31, 803.32, 803.33, |

---

803.34, 803.35, 803.36, 803.39,  
803.70, 803.71, 803.72, 803.73,  
803.74, 803.75, 803.76, 803.79,  
803.80, 803.81, 803.82, 803.83,  
803.84, 803.85, 803.86, 803.89,  
804.20, 804.21, 804.22, 804.23,  
804.24, 804.25, 804.26, 804.29,  
804.30, 804.31, 804.32, 804.33,  
804.34, 804.35, 804.36, 804.39,  
804.70, 804.71, 804.72, 804.73,  
804.74, 804.75, 804.76, 804.79,  
804.80, 804.81, 804.82, 804.83,  
804.84, 804.85, 804.86, 804.89,  
852.00, 852.01, 852.02, 852.03,  
852.04, 852.05, 852.06, 852.09,  
852.10, 852.11, 852.12, 852.13,  
852.14, 852.15, 852.16, 852.19,  
852.20, 852.21, 852.22, 852.23,  
852.24, 852.25, 852.26, 852.29,  
852.30, 852.31, 852.32, 852.33,  
852.34, 852.35, 852.36, 852.39,  
852.40, 852.41, 852.42, 852.43,  
852.44, 852.45, 852.46, 852.49,

---

---

|                                         |                 |                                                                                                                                                                                                                                                                                                                                                                                                                                                                                                                         |
|-----------------------------------------|-----------------|-------------------------------------------------------------------------------------------------------------------------------------------------------------------------------------------------------------------------------------------------------------------------------------------------------------------------------------------------------------------------------------------------------------------------------------------------------------------------------------------------------------------------|
|                                         |                 | 852.50, 852.51, 852.52, 852.53,<br>852.54, 852.55, 852.56, 852.59,<br>853.00, 853.01, 853.02, 853.03,<br>853.04, 853.05, 853.06, 853.09,<br>853.10, 853.11, 853.12, 853.13,<br>853.14, 853.15, 853.16, 853.19                                                                                                                                                                                                                                                                                                           |
| Nontraumatic intracranial<br>hemorrhage | ICD-9 diagnosis | 430, 431, 432.0, 432.1, 432.9                                                                                                                                                                                                                                                                                                                                                                                                                                                                                           |
| Upper gastrointestinal bleed            | ICD-9 diagnosis | 456.0, 456.20, 530.21, 530.82,<br>531.0, 531.00, 531.01, 531.20,<br>531.2, 531.21, 531.4, 531.40,<br>531.41, 531.60, 531.6, 531.61,<br>532.0, 532.00, 532.01, 532.2,<br>532.20, 532.21, 532.4, 532.40,<br>532.41, 532.6, 532.60, 532.61,<br>533.00, 533.0, 533.01, 533.20,<br>533.2, 533.21, 533.40, 533.4,<br>533.41, 533.60, 533.6, 533.61,<br>534.00, 534.0, 534.01, 534.2,<br>534.20, 534.21, 534.40, 534.4,<br>534.41, 534.60, 534.6, 534.61,<br>535.01, 535.11, 535.21, 535.31,<br>535.41, 535.51, 535.61, 535.71 |

---

---

|                              |                 |                                                                                                                                                                                                                                                                                                                                                                                                                                                                                                 |
|------------------------------|-----------------|-------------------------------------------------------------------------------------------------------------------------------------------------------------------------------------------------------------------------------------------------------------------------------------------------------------------------------------------------------------------------------------------------------------------------------------------------------------------------------------------------|
| Lower gastrointestinal bleed | ICD-9 diagnosis | 562.02, 562.03, 562.12, 562.13,<br>568.81, 569.3                                                                                                                                                                                                                                                                                                                                                                                                                                                |
| Other gastrointestinal bleed | ICD-9 diagnosis | 578.0, 578, 578.1, 578.9                                                                                                                                                                                                                                                                                                                                                                                                                                                                        |
| Hematuria                    | ICD-9 diagnosis | 599.70, 599.7, 599.71, 599.72                                                                                                                                                                                                                                                                                                                                                                                                                                                                   |
| Female-specific bleeding     | ICD-9 diagnosis | 620.7, 621.4, 624.5, 626., 626.3,<br>626.5, 626.6, 626.7, 626.8,<br>626.9, 627.0, 629.0                                                                                                                                                                                                                                                                                                                                                                                                         |
| Pregnancy-related bleeding   | ICD-9 diagnosis | 634.1, 634.10, 634.11, 634.12,<br>635.10, 635.1, 635.11, 635.12,<br>636.10, 636.1, 636.11, 636.12,<br>637.10, 637.1, 637.11, 637.12,<br>638.1, 639.1, 640, 640.80, 640.8,<br>640.81, 640.83, 640.90, 640.9,<br>640.91, 640.93, 641, 641.10,<br>641.1, 641.11, 641.13, 641.30,<br>641.3, 641.31, 641.33, 641.80,<br>641.8, 641.81, 641.83, 641.90,<br>641.9, 641.91, 641.93, 666.0,<br>666.00, 666, 666.02, 666.04,<br>666.1, 666.10, 666.12, 666.14,<br>666.2, 666.20, 666.22, 666.24,<br>762.1 |
| Hemarthrosis bleed           | ICD-9 diagnosis | 719.01, 719.1, 719.11, 719.12,                                                                                                                                                                                                                                                                                                                                                                                                                                                                  |

---

---

|                           |                 |                                                                                                                                                                                                                                                                                                                                                                    |
|---------------------------|-----------------|--------------------------------------------------------------------------------------------------------------------------------------------------------------------------------------------------------------------------------------------------------------------------------------------------------------------------------------------------------------------|
|                           |                 | 719.13, 719.14, 719.15, 719.16,<br>719.17, 719.18, 719.19                                                                                                                                                                                                                                                                                                          |
| Hemoglobinuria bleed      | ICD-9 diagnosis | 791.2                                                                                                                                                                                                                                                                                                                                                              |
| All other bleeding events | ICD-9 diagnosis | 078.6, 246.3, 287, 287.2, 287.8,<br>287.9, 360.43, 362.43, 362.81,<br>363.6, 363.61, 363.62, 363.72,<br>372.72, 374.81, 376.32, 377.42,<br>379.23, 380.31, 423.0, 459.0,<br>596.7, 608.82, 665.7, 665.70,<br>665.71, 665.72, 665.74, 767.11,<br>782.7, 784.7, 784.8, 786.3,<br>864.01, 864.11, 865.01, 865.11,<br>866.01, 866.11, 997.02, 998.1,<br>998.11, 998.12 |

---

CCS, Clinical Classifications Software, CNS, central nervous system; HIV, human immunodeficiency virus; ICD, International Classification of Diseases; Ig, immunoglobulin; IVIg, intravenous Ig.
