# Supplementary material
Source: publisher figshare collection journal article supplement (https://tandf.figshare.com/articles/dataset/_/3083800)
Supplement: Supplementary file 2 [file 1 › SuppTableII.pdf]

Supplement Table II. Estimated 2009 pediatric discharges in patients with ITP by gender and by age.

| Factor              | <i>n</i> | 95% CI |      | LOS | 95% CI |     | Costs  | 95% CI |        |
|---------------------|----------|--------|------|-----|--------|-----|--------|--------|--------|
| Male <sup>a</sup>   | 2293     | 1998   | 2588 | 1.9 | 1.8    | 2.0 | \$5312 | \$4915 | \$5740 |
| Female <sup>a</sup> | 2122     | 1873   | 2372 | 2.0 | 1.9    | 2.1 | \$5476 | \$5058 | \$5928 |
| Age 6–12 months     | 91       | 65     | 118  | 2.1 | 1.7    | 2.4 | \$3597 | \$2961 | \$4369 |
| Age 1–5 years       | 1934     | 1686   | 2183 | 1.8 | 1.7    | 1.9 | \$3967 | \$3682 | \$4274 |
| Age 6–9 years       | 826      | 709    | 944  | 1.9 | 1.8    | 2.0 | \$5426 | \$4945 | \$5954 |
| Age 10–13 years     | 747      | 624    | 870  | 2.0 | 1.9    | 2.2 | \$7545 | \$6764 | \$8416 |
| Age 14–17 years     | 900      | 776    | 1024 | 2.3 | 2.2    | 2.5 | \$8343 | \$7471 | \$9316 |

<sup>a</sup>There were an additional 84 ITP hospitalizations for which gender was not indicated, bringing the total number of hospitalizations to 4499.

CI, confidence interval; ITP, immune thrombocytopenia; LOS, length of stay.
